# Supplementary material
Source: PubMed Central journal article supplement (PMC7060370)
Supplement: BPH-177-1525-s001.pdf [file BPH-177-1525-s001.pdf]

## SUPPLEMENTARY DATA

### **NOP receptor antagonism reduces alcohol drinking in male and female rats through mechanisms involving the central amygdala and the ventral tegmental area.**

**Running title:** NOP receptor antagonism and alcohol drinking.

Anna Maria Borruto,<sup>1</sup> Yannick Fotio,<sup>1</sup> Serena Stopponi,<sup>1</sup> Gloria Brunori,<sup>1,2</sup> Michele Petrella,<sup>1</sup> Francesca Felicia Caputi,<sup>3</sup> Patrizia Romualdi,<sup>3</sup> Sanzio Candeletti,<sup>3</sup> Rajesh Narendran,<sup>4,5</sup> Linda M. Rorick-Kehn,<sup>6</sup> Massimo Ubaldi,<sup>1</sup> Friedbert Weiss,<sup>7</sup> Roberto Ciccocioppo<sup>1\*</sup>

<sup>1</sup>*School of Pharmacy, Pharmacology Unit, University of Camerino, Camerino, Italy*

<sup>2</sup>*Biomedical Science Department, Schmidt College of Medicine, Florida Atlantic University, Boca Raton, FL, United States*

<sup>3</sup>*Department of Pharmacy and Biotechnology, Alma Mater Studiorum, University of Bologna, Bologna, Italy.*

<sup>4</sup>*Department of Radiology, University of Pittsburgh, Pittsburgh, Pennsylvania;*

<sup>5</sup>*Department of Psychiatry, University of Pittsburgh, Pittsburgh, Pennsylvania.*

*Lilly Research Laboratories, Lilly Corporate Center, Indianapolis, IN, United States*

<sup>7</sup>*Department of Molecular and Cellular Neuroscience, The Scripps Research Institute, La Jolla, CA, USA.*

## SUPPLEMENTARY FIGURE

### Central Nucleus of the Amygdala

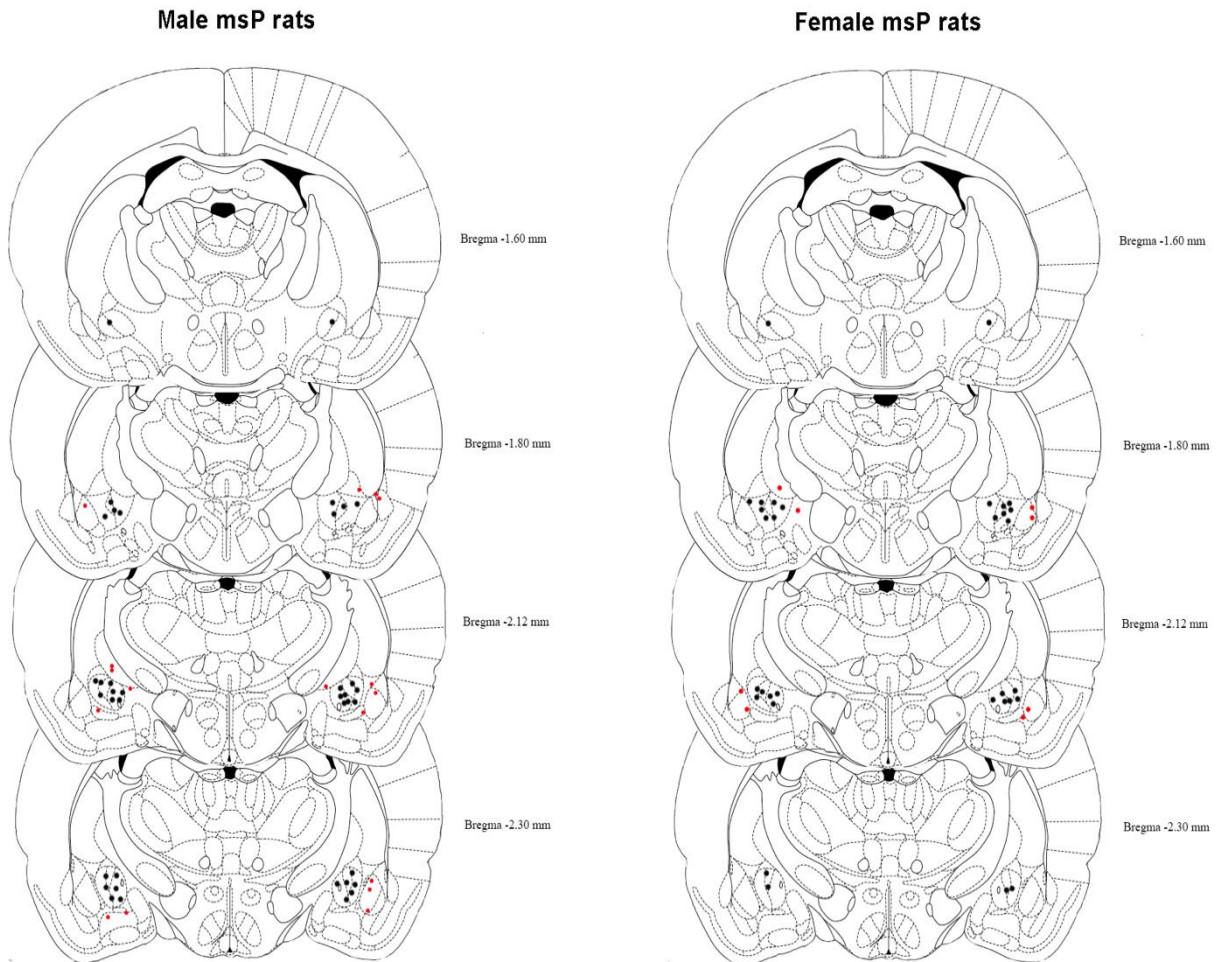

**Supplementary Fig. S1. Schematic representation of intra-CeA sites of injection assessed by histological analysis.**

Male ( $n = 13$ ) and female ( $n = 9$ ) msP rats were implanted with bilateral cannulas aimed at the CeA and then subjected to a two bottle-free choice test. Black dots represent the correct cannula placement ( $n = 8$  male;  $n = 7$  female). Red dots indicate animals excluded for the incorrect cannula placement. Only data resulting from correct cannula placement were included in the statistical analysis.

## Ventral Tegmental Area

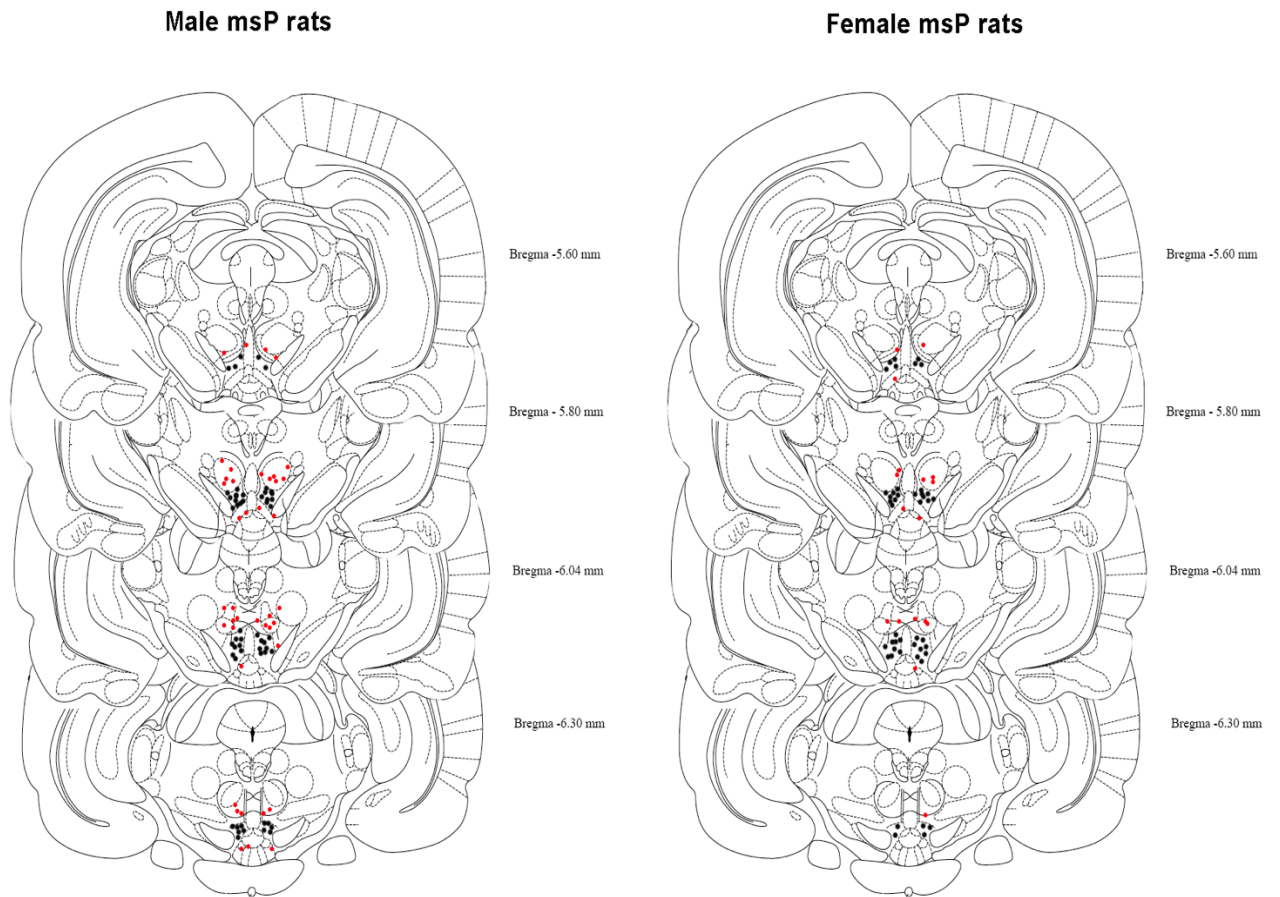

### Supplementary Fig. S2. Schematic representation of intra-VTA sites of injection assessed by histological analysis.

Male ( $n = 17$ ) and female ( $n = 12$ ) msP rats were implanted with bilateral cannulas aimed at the VTA and then subjected to a two bottle-free choice test. Black dots represent the correct cannula placement ( $n = 9$  male;  $n = 8$  female). Red dots indicate animals excluded for the incorrect cannula placement. Only data resulting from correct cannula placement were included in the statistical analysis.

## Nucleus Accumbens

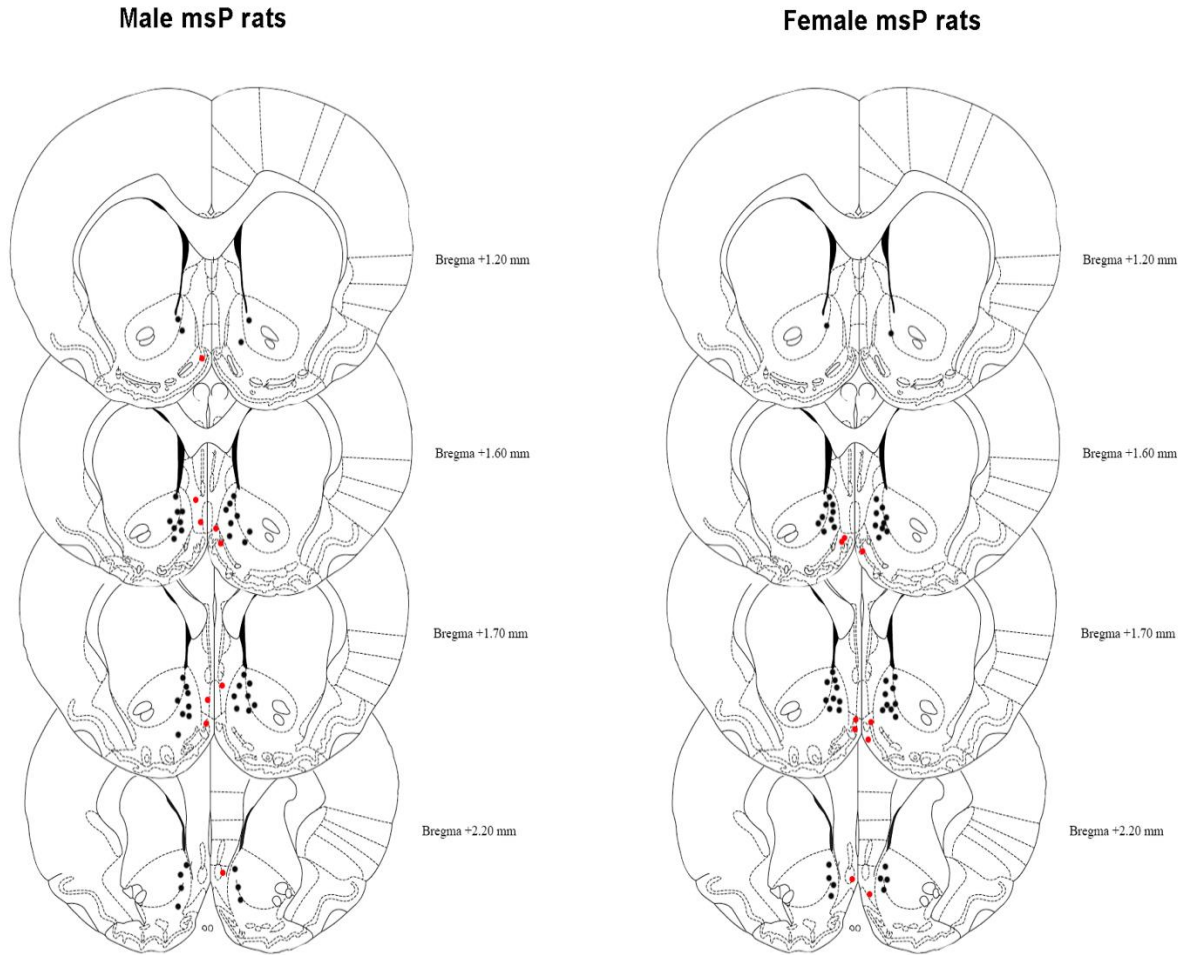

**Supplementary Fig. S3. Schematic representation of intra-NAc sites of injection assessed by histological analysis.**

Male ( $n = 10$ ) and female ( $n = 11$ ) msP rats were implanted with bilateral cannulas aimed at the NAc and then subjected to a two bottle-free choice test. Black dots represent the correct cannula placement ( $n = 8$  male;  $n = 9$  female). Red dots indicate animals excluded for the incorrect cannula placement. Only data resulting from correct cannula placement were included in the statistical analysis.

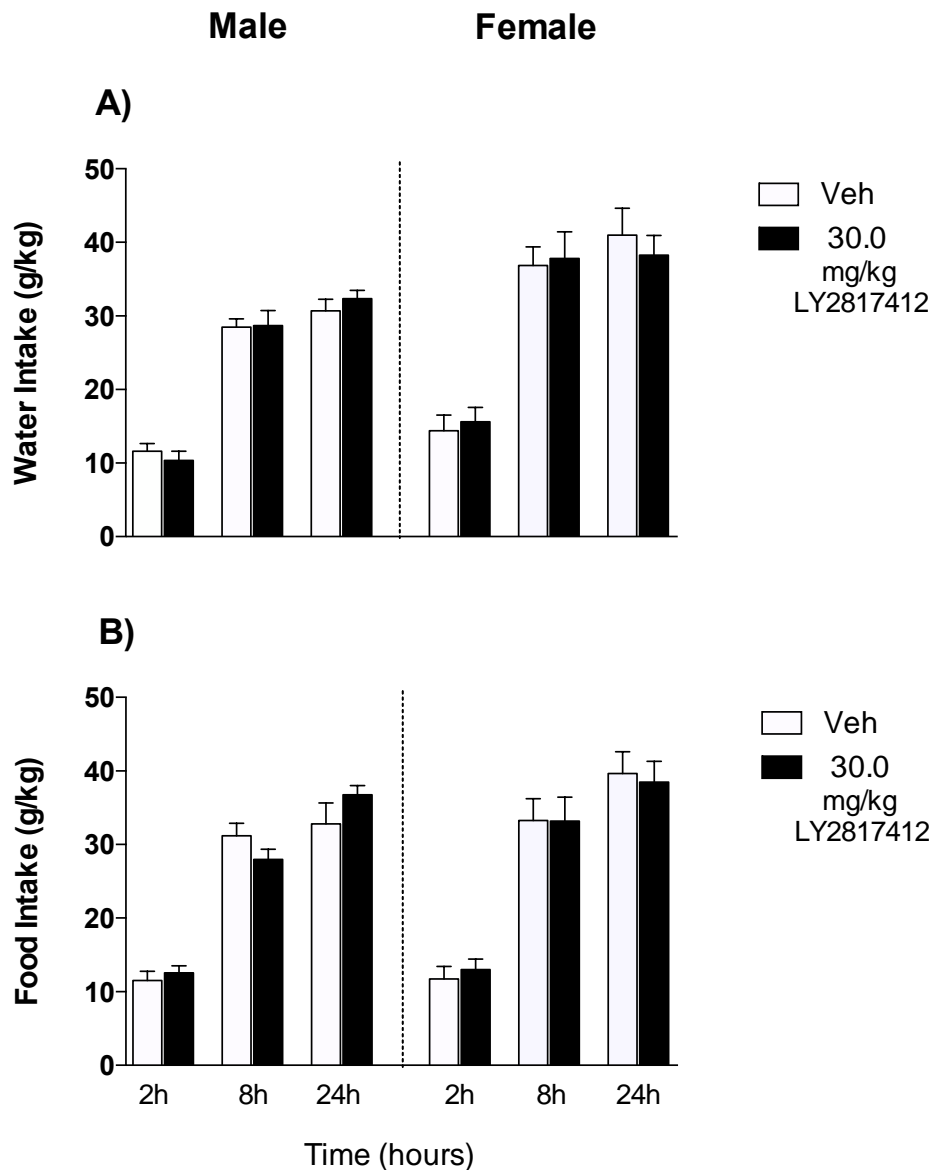

**Supplementary Fig. S4. Effect of systemic LY2817412 administration on standard food pellet and water consumption in male and female msP rats.**

Male ( $n = 10$ ) and female ( $n = 10$ ) msP rats were tested for home cage water drinking and food intake. Following treatment with LY2817412 (30.0 mg/kg) or vehicle, voluntary intake of: **A)** water, **B)** food was recorded at 2, 8 and 24 hours in male and in female msP rats. Values are presented as mean  $\pm$  SEM. Three-way ANOVA followed by the *post hoc* Newman-Keuls tests. Statistical difference was never significant.
